# Supplementary material for: Willingness to Pay for Enhanced Mandatory Labelling of Genetically Modified Soybean Oil: Evidence from a Choice Experiment in China
Source: PubMed Central journal article supplement (PMC8067038; doi:10.3390/foods10040736), 2021-03-30
Supplement: foods-10-00736-s001.pdf [file foods-10-00736-s001.pdf]

**Table S1.** Prices of the “X” brand edible oil in the same size.

| <b>Species and Capacity Edible Oil</b>                            | <b>Price (RMB)</b> |
|-------------------------------------------------------------------|--------------------|
| 5L GM soybean oil                                                 | 45.80              |
| 5L non-GM soybean oil                                             | 66.80              |
| 5L corn oil (non-GM)                                              | 78.00              |
| 5L peanut oil (non-GM)                                            | 128.50             |
| 5L rapeseed oil (non-GM)                                          | 59.90              |
| 5L sunflower oil (non-GM)                                         | 68.80              |
| 5L canola oil (non-GM)                                            | 65.80              |
| 5L sunflower oil blend (non-GM sunflower seed and GM soybean oil) | 49.90              |
| 5L edible corn oil blend (non-GM corn and GM soybean oil)         | 49.90              |

The brand only has 4L peanut oil (non-GM) with the price of RMB 102.8. As the marginal cost of the package from 4–5L is small, we use a simple average to calculate the price of 5L peanut oil. The data are based on the price of “X” brand edible oil on Feb 17, 2016 at Suning (<https://www.suning.com/>). RMB 6.8 = USD 1.
